# Supplementary material
Source: publisher site journal article supplement (https://www.dovepress.com/article/244778)
Supplement: Supplementary file 1 [file get_supplementary_file.php]

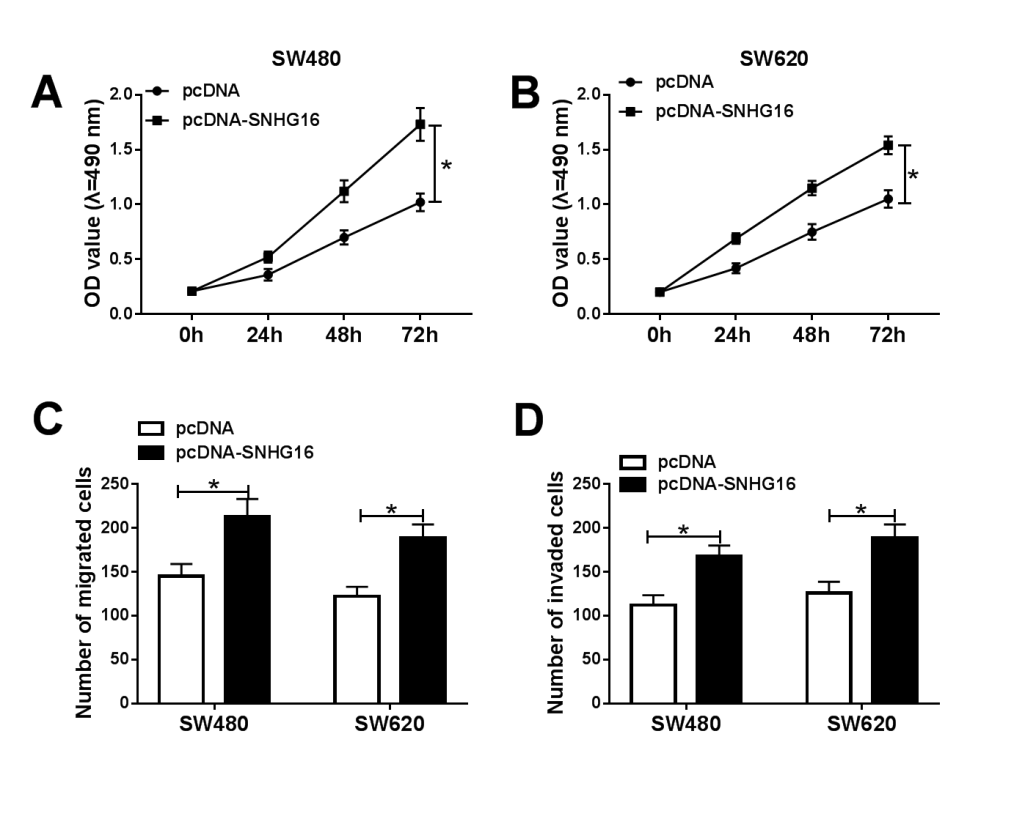


Supplement Fig. 1 Overexpression of SNHG16 regulated the progression of CRC cells. SW480 and SW620 cells were transfected with pcDNA-SHNG16 and pcDNA. The results of MTT assay (A-B) and transwell assay (C-D) revealed that SNHG16 overexpression promoted the proliferation, migration and invasion of SW480 and SW620 cells. * *P* < 0.05.


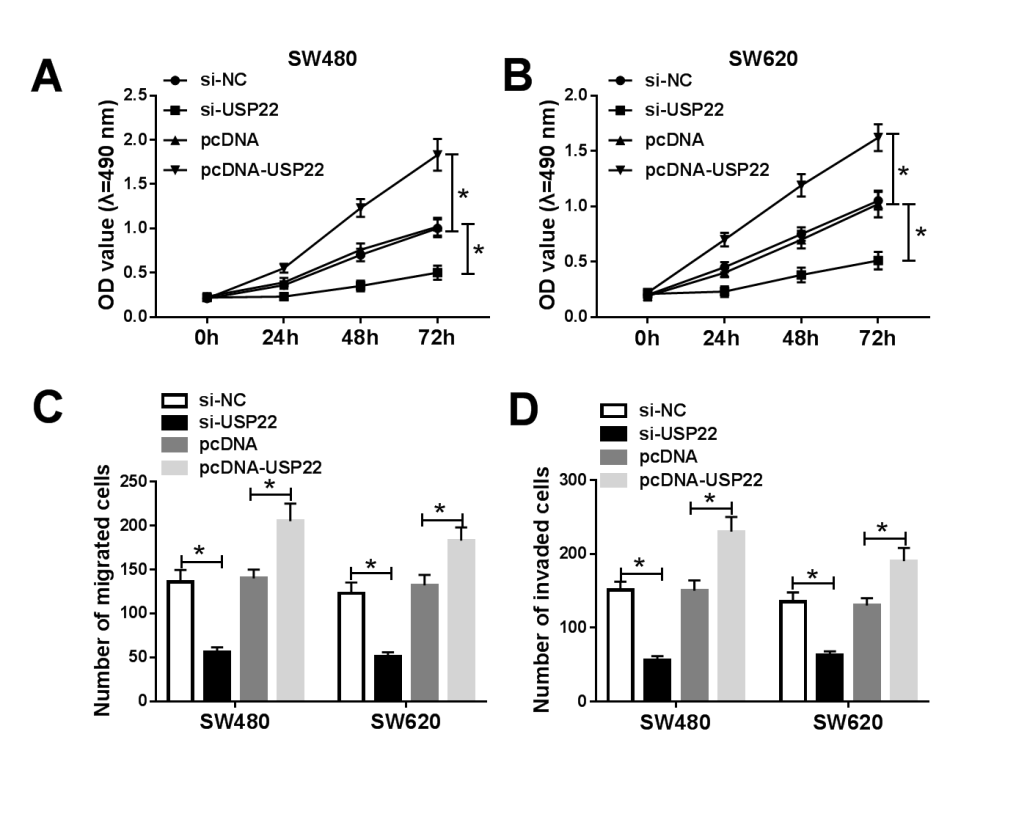


Supplement Fig. 2 Knockdown and overexpression of USP22 regulated the progression of CRC cells. SW480 and SW620 cells were transfected with si-USP22, pcDNA-USP22 and their negative controls (si-NC and pcDNA). The results of MTT assay (A-B) and transwell assay (C-D) suggested that USP22 knockdown inhibited the proliferation, migration and invasion of SW480 and SW620 cells, while its overexpression had an opposite effect. * *P* < 0.05.
